# Supplementary material for: The synergism of B and T lymphocyte attenuator (BTLA) and cytotoxic T lymphocyte associated antigen-4 (CTLA-4) attenuated acute T-cell mediated rejection and prolonged renal graft survival
Source: PubMed Central journal article supplement — Transl Androl Urol. 2020 Oct;9(5):1990–9. doi: 10.21037/tau-20-728 (PMC7658142; doi:10.21037/tau-20-728), 2020-10
Supplement: tau-09-05-1990-dss.pdf [file tau-09-05-1990-dss.pdf]

## Data Sharing Statement

|                     |                                                                                                                                                    |                                                                                   |
|---------------------|----------------------------------------------------------------------------------------------------------------------------------------------------|-----------------------------------------------------------------------------------|
| <b>Article Info</b> | <a href="http://dx.doi.org/10.21037/tau-20-728">http://dx.doi.org/10.21037/tau-20-728</a>                                                          |                                                                                   |
| <b>Item</b>         | <b>Question</b>                                                                                                                                    | <b>Authors' Response<br/>(place "-" if not applicable)</b>                        |
| 1                   | Would you like to share data collected for your study to others?                                                                                   | Yes                                                                               |
| 2                   | If not, would you like to share the reason for your decision?                                                                                      | -                                                                                 |
| 3                   | What data in particular will be shared?                                                                                                            | -                                                                                 |
| 4                   | Any other documents will be share? Such as study protocol, statistical analysis plan, informed consent form, clinical study report, analytic code. | Protocol of kidney transplantation model in rats                                  |
| 5                   | When will data availability begin?                                                                                                                 | From the publication date                                                         |
| 6                   | When will data availability end?                                                                                                                   | -                                                                                 |
| 7                   | To whom will you share the data?                                                                                                                   | Researches who are interested in studies of kidney transplantation.               |
| 8                   | For what type of analysis or purpose?                                                                                                              | -                                                                                 |
| 9                   | How or where can the data/documents be obtained?                                                                                                   | Emails could be sent to the address below to obtain the data: zhanghc@njmu.edu.cn |
| 10                  | Any other restrictions?                                                                                                                            | -                                                                                 |
